# Action potential counting at giant mossy fiber terminals gates information transfer in the hippocampus

Simon Chamberland<sup>1\*</sup>, Yulia Timofeeva<sup>2,3,4\*</sup>, Alesya Evstratova<sup>1</sup>, Kirill Volynski<sup>4†</sup> and Katalin Tóth<sup>1†</sup>

<sup>1</sup>Quebec Mental Health Institute, Department of Psychiatry and Neuroscience, Université Laval, Quebec City, Quebec, Canada

<sup>2</sup>Department of Computer Science, University of Warwick, Coventry, UK

<sup>3</sup>Centre for Complexity Science, University of Warwick, Coventry, UK

<sup>4</sup>University College London Institute of Neurology, University College London, London, UK

\*These authors contributed equally to this study.

†Correspondence: katalin.toth@fmed.ulaval.ca (K.T.), k.volynski@ucl.ac.uk (K.V.)

**Running title:** Giant MF terminals count the number of action potentials

**Keywords:** information transfer, calcium, presynaptic, neurotransmitter release, information coding, action potential counting

## Acknowledgements:

The study was supported by CIHR (MOP-81142) and NSERC (RGPIN-2015-06266) grants (K.T.), NSERC and CTRN PhD fellowships (S.C.) and by the Medical Research Council and the Wellcome Trust (K.V.). We are grateful to D.M. Kullmann for reading the manuscript and providing feedback.

## Author contributions:

S.C., Y.T., K.V. and K.T. designed the study. S.C., A.E., and K.T. performed experiments, Y.T. and K.V. performed computational modelling, S.C., Y.T., K.V. and K.T. analyzed the data, S.C., Y.T., K.V. and K.T. wrote the paper.

## 34 **Abstract**

35 Hippocampal mossy fibers have long been recognized as conditional detonators owing to  
36 prominent short-term facilitation, but the patterns of activity required to fire postsynaptic CA3  
37 pyramidal neurons remain poorly understood. We show that mossy fibers count the number of  
38 spikes to transmit information to CA3 pyramidal cells through a distinctive interplay between  
39 presynaptic calcium dynamics, buffering and vesicle replenishment. This identifies a previously  
40 unexplored information coding mechanism in the brain.

41

## 42 **Main text**

43 Neurons encode and transmit information in the frequency and temporal precision of  
44 action potentials (APs) they discharge<sup>1,2</sup>. Presynaptic terminals are key elements involved in the  
45 translation of electrical signals to neurotransmitter release<sup>3</sup>. During active states, several types of  
46 neurons fire in bursts. For example, hippocampal granule cells fire infrequently, but discharge  
47 bursts of APs with highly variable frequencies<sup>4,5</sup>. However, how presynaptic mossy fiber bouton  
48 (MFB) terminals decode the frequency and the number of APs in the incoming bursts to transmit  
49 information remains poorly understood.

50 We first aimed to determine how AP transmission to CA3 pyramidal cells is encoded by  
51 the frequency and the number of APs discharged by granule cells. We recorded CA3 pyramidal  
52 cells in current-clamp and stimulated mossy fibers using trains of APs with the initial frequency  
53 of the first 5 stimuli delivered at 20 or 100 Hz and the last 3 stimuli fixed at 100 Hz. As expected  
54 AP firing by CA3 cells progressively increased during mossy fiber stimulation (**Fig. 1a-c**). The  
55 probability of observing the first postsynaptic spike sharply increased at the 6<sup>th</sup> stimuli (**Fig. 1d**).  
56 Both the probability of CA3 pyramidal cell firing at the 6<sup>th</sup> stimulus and the probability of  
57 observing the first AP were independent from the initial burst frequency (**Fig. 1c,d**). This  
58 suggests that AP transmission at MFB terminals is mainly determined by the number of spikes  
59 within the train and not by the average train frequency. Glutamate release from MFBs is greatly  
60 amplified during trains of stimuli<sup>6-8</sup>, however how the frequency and number of stimuli are  
61 translated to specific patterns of glutamate release remains unknown. We varied the burst  
62 frequency and the number of stimuli to dissect the contribution of these two parameters. The 6<sup>th</sup>

63 evoked post synaptic current (EPSC) amplitude in a 5X20 Hz + 1X100 Hz burst was nearly  
64 identical to the 6<sup>th</sup> EPSC amplitude of a pure 100 Hz train (**Fig. 1e,f**). Similarly, the 6<sup>th</sup> EPSC  
65 amplitude of a 5X100 Hz + 1X20 Hz burst closely matched the amplitude of the 6<sup>th</sup> EPSC in a 20  
66 Hz train (**Fig. 1g,h**). This supports the idea that the average frequency of the train is not a  
67 determining factor of the rate of glutamate release. Instead, the number of preceding stimuli and  
68 the frequency of only the last stimulus appear to dictate the efficiency of synchronous glutamate  
69 release at the last 6<sup>th</sup> spike. These data argue that MFB terminals use a counting logic. We  
70 confirmed that such counting logic was observed for any stimulus number between 2 – 10  
71 (**Supplementary Fig. 1a,b**) and for frequencies between 10 and 100 Hz (**Supplementary Fig.**  
72 **1c**).

73 To gather insights on the presynaptic determinants of the counting logic, we next  
74 performed fast whole-bouton two-photon random-access Ca<sup>2+</sup> imaging using the low-affinity  
75 Ca<sup>2+</sup> indicator Fluo-4FF to measure the dynamic modulation of presynaptic [Ca<sup>2+</sup>] during AP  
76 trains (**Fig. 2**). We found that the amplitude of AP-evoked Ca<sup>2+</sup>-fluorescence transients remained  
77 constant during AP bursts (**Fig. 2b-e**). This indicates that AP-evoked Ca<sup>2+</sup> influx does not change  
78 during 20 Hz or 100 Hz stimulations and therefore, modulation of voltage-gated Ca<sup>2+</sup> channel  
79 (VGCCs) activity is unlikely to contribute to short-term plasticity in MFB terminals. We next  
80 explored the presynaptic Ca<sup>2+</sup> dynamics by direct fitting of the experimental traces using a non-  
81 stationary single compartment model<sup>9,10</sup> (**Fig. 2b,c**, Online Methods). The model, which  
82 incorporated three major endogenous Ca<sup>2+</sup> buffers known to be present in MFBs (calbindin-D<sub>28K</sub>  
83 (CB), calmodulin (CaM), and ATP) provided close fits of the experimental data (**Fig. 2b,c** and  
84 **Supplementary Fig. 2**). It is noteworthy that a similar model with a single fast high affinity  
85 endogenous buffer<sup>11</sup> could not replicate the Ca<sup>2+</sup> imaging data (**Supplementary Fig. 3**). The  
86 fitting allowed us to estimate Ca<sup>2+</sup> removal rate in our experimental conditions ( $k_{rem}$  range 0.2 -  
87 0.7 ms<sup>-1</sup>), which was in close agreement with previous estimates obtained with high affinity Ca<sup>2+</sup>  
88 indicator Fluo-4<sup>9</sup>.

89 To understand whether the interplay between presynaptic Ca<sup>2+</sup> dynamics and endogenous  
90 Ca<sup>2+</sup> buffering can lead to AP counting, we performed quantitative modelling of AP-evoked Ca<sup>2+</sup>  
91 influx, buffering and diffusion, and glutamate release in MFBs. The three-dimensional model  
92 incorporated key ultrastructural and functional properties of MFBs including multiple release

93 sites, experimentally constrained presynaptic  $\text{Ca}^{2+}$  dynamics and loose coupling between VGCCs  
94 and vesicular release sensors<sup>9,11-13</sup> (**Fig. 3a** and Online Methods). The simulation unit, which  
95 represented a part of MFB with a single release site, was modelled as a parallelepiped of size 0.5  
96  $\mu\text{m} \times 0.5 \mu\text{m} \times 0.79 \mu\text{m}$  with a single VGCC cluster in the middle of the bottom base (**Fig. 3a**).  
97 As in the case of the single compartment model we assumed the presence of three major MFB  
98 endogenous  $\text{Ca}^{2+}$  buffers: CB, ATP and CaM. At physiological conditions CaM is known to be  
99 distributed between membrane-bound and mobile states, and this distribution is regulated by  
100 intracellular  $[\text{Ca}^{2+}]$ <sup>14-16</sup>. We first considered a limiting case of ‘Mobile CaM’ model. We  
101 simulated spatial MFB  $\text{Ca}^{2+}$  dynamics in response to bursts of APs and used the obtained  $[\text{Ca}^{2+}]$   
102 transients at the release site (90 nm away from the VGCC cluster, (**Fig. 3b**) to perform  
103 simulations of vesicular release using a Monte Carlo implementation of  $\text{Ca}^{2+}$ -activated vesicle  
104 fusion model<sup>12</sup> (**Fig. 3c** and **Supplementary Fig. 4**). To account for vesicle replenishment during  
105 AP bursts we included a vesicle replenishment step in the model and experimentally constrained  
106 the replenishment rate constant ( $k_{rep} = 20 \text{ s}^{-1}$ ) (**Supplementary Fig. 5**). We found that ‘Mobile  
107 CaM’ model indeed replicated the AP counting during mixed 20 Hz and 100 Hz AP trains (**Fig.**  
108 **3d,e** and **Supplementary Fig. 6**). What mechanisms underlie the counting logic? The model  
109 predicted that the peak values of  $\text{Ca}^{2+}$  transients ( $[\text{Ca}^{2+}]_{peak}$ ) were gradually augmented during  
110 AP bursts which was mainly attributed to the increase in residual  $[\text{Ca}^{2+}]_{residual}$  and was mostly  
111 independent of the stimulation frequency (**Fig. 3b**). This argues that EPSC facilitation predicted  
112 by ‘Mobile CaM’ model was due to  $[\text{Ca}^{2+}]_{residual}$  accumulation and not due to endogenous  $\text{Ca}^{2+}$   
113 buffer saturation (which normally leads to a progressive increase of the amplitudes of individual  
114 AP-evoked  $\text{Ca}^{2+}$  transients  $[\text{Ca}^{2+}]_{amp} = [\text{Ca}^{2+}]_{peak} - [\text{Ca}^{2+}]_{residual}$ <sup>13</sup>). Indeed, the model revealed that  
115 fast and low affinity CaM N-lobe did not show progressive saturation. However, slower and high  
116 affinity buffers CB and CaM C-lobe did saturate during AP bursts (**Supplementary Fig. 7**). This  
117 at first sight contradictory observation was fully in line with the dominant effect of CaM N-lobe  
118 on release site  $\text{Ca}^{2+}$  dynamics and vesicle fusion<sup>14</sup> (**Supplementary Fig. 8**).

119 Although ‘Mobile CaM’ model replicated AP counting the overall level of EPSC  
120 facilitation predicted by this model was  $\sim 40\%$  lower than the experimentally observed values  
121 (**Fig. 1f, h**). Therefore, we considered another limiting case, ‘CaM dislocation’ model. In this  
122 model (described in detail in our previous publication<sup>14</sup>) we considered that CaM was initially

123 bound to the presynaptic membrane via interaction of its C-lobe with neuromodulin and with  
124 other IQ-motif presynaptic membrane proteins (e.g. VGCCs)<sup>14-16</sup>. The model assumed that  $Ca^{2+}$   
125 binding by the CaM C-lobe during AP bursts led to dissociation of CaM from its membrane  
126 binding partners and thus resulted in a stimulation-dependent reduction of  $Ca^{2+}$  buffering  
127 capacity in the AZ (**Fig. 3f**). This in turn led to progressive increase of  $[Ca^{2+}]$  transients at the  
128 AZ (**Fig. 3g**) and to facilitation of EPSCs (**Fig. 3h**). The progressive reduction of AZ  $Ca^{2+}$   
129 buffering capacity predicted by the model did not depend on the frequency of AP bursts. Thus,  
130 ‘CaM dislocation’ model also supported the counting logic at MFB terminals. In contrast to  
131 ‘Mobile CaM’ model the dislocation model predicted substantial increase of AP-evoked  
132  $[Ca^{2+}]_{amp}$  at the release site which resulted in stronger EPSC facilitation (**Fig. 3g,i**). Overall, the  
133 experimentally observed level of EPSC facilitation in MFB terminals is likely to be attributed to  
134 a joint contribution of the ‘Mobile CaM’ and ‘CaM dislocation’ limiting cases (**Fig. 3i**).  
135 Interestingly, the effect of somewhat stronger augmentation of  $[Ca^{2+}]_{peak}$  on vesicular release at  
136 higher frequencies was compensated in both models by the lower vesicle occupancy at the  
137 release site during high frequency stimulation (**Supplementary Fig. 10**). This indicates that  
138 frequency-dependent differences in release site occupancy also contribute to the counting logic  
139 behavior of MFBs.

140 We aimed to understand how granule cells generate CA3 pyramidal cells firing, the first  
141 relay of information in the hippocampus<sup>17</sup>. This question is important because discharge of a  
142 single AP by a single CA3 pyramidal cell has dramatic network consequences such as initiation  
143 of sharp-wave ripples<sup>18</sup>. We demonstrate that MFB count the number of spikes to transmit  
144 information to CA3 pyramidal cells independently of the average spike frequency. Our results  
145 argue that MFB counting logic can be explained by (i) accumulation of  $[Ca^{2+}]_{residual}$  which is  
146 largely independent of stimulation frequency due to relatively slow  $Ca^{2+}$  removal rate  $k_{rem}$ ; (ii)  
147 loose coupling between VGCCs and vesicular release sensors which leads to moderate changes  
148 of  $[Ca^{2+}]_{peak}$  at release site (in the range of 10  $\mu$ M - 15 $\mu$ M) that is efficiently modulated by  
149 changes in  $[Ca^{2+}]_{residual}$  ( $\sim 2$   $\mu$ M); (iii) the dominant role of CaM N-lobe on fast  $Ca^{2+}$  buffering at  
150 the release sites; (iv) possible contribution of stimulation-dependent reduction of  $Ca^{2+}$  buffering  
151 capacity in the AZ due to CaM dislocation, and; (v) more efficient vesicle replenishment at lower  
152 frequencies. All of the above elements are uniquely combined in MFBs to allow AP counting, an

153 information coding strategy which contrasts rate and temporal coding described in other types of  
154 synapses<sup>2</sup>.

## 155 Bibliography

- 156 1 Adrian, E. D. & Zotterman, Y. The impulses produced by sensory nerve-endings: Part II.  
157 The response of a Single End-Organ. *The Journal of physiology* **61**, 151-171 (1926).
- 158 2 Stein, R. B., Gossen, E. R. & Jones, K. E. Neuronal variability: noise or part of the  
159 signal? *Nature reviews. Neuroscience* **6**, 389-397, doi:10.1038/nrn1668 (2005).
- 160 3 Del Castillo, J. & Katz, B. Quantal components of the end-plate potential. *The Journal of*  
161 *physiology* **124**, 560-573 (1954).
- 162 4 Pernia-Andrade, A. J. & Jonas, P. Theta-gamma-modulated synaptic currents in  
163 hippocampal granule cells in vivo define a mechanism for network oscillations. *Neuron*  
164 **81**, 140-152, doi:10.1016/j.neuron.2013.09.046 (2014).
- 165 5 Pilz, G. A. *et al.* Functional Imaging of Dentate Granule Cells in the Adult Mouse  
166 Hippocampus. *The Journal of neuroscience : the official journal of the Society for*  
167 *Neuroscience* **36**, 7407-7414, doi:10.1523/JNEUROSCI.3065-15.2016 (2016).
- 168 6 Toth, K., Soares, G., Lawrence, J. J., Philips-Tansey, E. & McBain, C. J. Differential  
169 mechanisms of transmission at three types of mossy fiber synapse. *The Journal of*  
170 *neuroscience : the official journal of the Society for Neuroscience* **20**, 8279-8289 (2000).
- 171 7 Chamberland, S., Evstratova, A. & Toth, K. Interplay between Synchronization of  
172 Multivesicular Release and Recruitment of Additional Release Sites Support Short-Term  
173 Facilitation at Hippocampal Mossy Fiber to CA3 Pyramidal Cells Synapses. *The Journal*  
174 *of neuroscience : the official journal of the Society for Neuroscience* **34**, 11032-11047,  
175 doi:10.1523/JNEUROSCI.0847-14.2014 (2014).
- 176 8 Salin, P. A., Scanziani, M., Malenka, R. C. & Nicoll, R. A. Distinct short-term plasticity  
177 at two excitatory synapses in the hippocampus. *Proceedings of the National Academy of*  
178 *Sciences of the United States of America* **93**, 13304-13309 (1996).
- 179 9 Scott, R. & Rusakov, D. A. Main determinants of presynaptic Ca<sup>2+</sup> dynamics at  
180 individual mossy fiber-CA3 pyramidal cell synapses. *The Journal of neuroscience : the*  
181 *official journal of the Society for Neuroscience* **26**, 7071-7081,  
182 doi:10.1523/JNEUROSCI.0946-06.2006 (2006).
- 183 10 Ermolyuk, Y. S. *et al.* Differential triggering of spontaneous glutamate release by P/Q-,  
184 N- and R-type Ca<sup>2+</sup> channels. *Nature neuroscience* **16**, 1754-1763, doi:10.1038/nn.3563  
185 (2013).
- 186 11 Bischofberger, J., Geiger, J. R. & Jonas, P. Timing and efficacy of Ca<sup>2+</sup> channel  
187 activation in hippocampal mossy fiber boutons. *The Journal of neuroscience : the official*  
188 *journal of the Society for Neuroscience* **22**, 10593-10602 (2002).
- 189 12 Lou, X., Scheuss, V. & Schneggenburger, R. Allosteric modulation of the presynaptic  
190 Ca<sup>2+</sup> sensor for vesicle fusion. *Nature* **435**, 497-501, doi:10.1038/nature03568 (2005).
- 191 13 Vyleta, N. P. & Jonas, P. Loose coupling between Ca<sup>2+</sup> channels and release sensors at a  
192 plastic hippocampal synapse. *Science* **343**, 665-670, doi:10.1126/science.1244811  
193 (2014).
- 194 14 Timofeeva, Y. & Volynski, K. E. Calmodulin as a major calcium buffer shaping vesicular  
195 release and short-term synaptic plasticity: facilitation through buffer dislocation.  
196 *Frontiers in cellular neuroscience* **9**, 239, doi:10.3389/fncel.2015.00239 (2015).

- 197 15 Kumar, V. *et al.* Structural basis for the interaction of unstructured neuron specific  
198 substrates neuromodulin and neurogranin with Calmodulin. *Scientific reports* **3**, 1392,  
199 doi:10.1038/srep01392 (2013).
- 200 16 Alexander, K. A., Wakim, B. T., Doyle, G. S., Walsh, K. A. & Storm, D. R.  
201 Identification and characterization of the calmodulin-binding domain of neuromodulin, a  
202 neurospecific calmodulin-binding protein. *The Journal of biological chemistry* **263**,  
203 7544-7549 (1988).
- 204 17 Andersen, P., Bliss, T. V. & Skrede, K. K. Lamellar organization of hippocampal  
205 pathways. *Experimental brain research* **13**, 222-238 (1971).
- 206 18 Bazelot, M., Telenczuk, M. T. & Miles, R. Single CA3 pyramidal cells trigger sharp  
207 waves in vitro by exciting interneurons. *The Journal of physiology*,  
208 doi:10.1113/JP271644 (2016).

209

210

211

212

213

214

215

216

217

218

219

220

221

222

223

224

225

226

## 227 **Figure Legends**

### 228 **Figure 1 – Transmission of information to CA3 pyramidal cells depends on the number of** 229 **APs in bursts**

230 (a) Representative current-clamp recordings from a CA3 pyramidal cell. The red arrows point to  
231 the 6<sup>th</sup> stimulus in the trains where postsynaptic AP probability increased sharply. (b, c) CA3  
232 pyramidal cell firing probability as a function of time (b) and of the number of APs (c) during  
233 two stimulation paradigms. (d) Probability of observing the first AP. Both AP probability and the  
234 probability of observing the first AP are mainly determined by the number of preceding APs but  
235 not by the average burst frequency (b-d, n = 5 cells). (e-h) Analysis of short-term facilitation at  
236 MFBs. (e,g) Representative trains of EPSCs recorded using indicated stimulation paradigms.  
237 Gray traces, single trials; black traces, the averages of 20 trials. (f,h) Summary graphs showing  
238 average EPSC amplitude as a function of time (n = 19 for 20 Hz; n = 15 for 5X20 Hz + 1X100  
239 Hz; n = 25 for 100 Hz; n = 10 for 5X100 Hz+ 1X20 Hz).

240

### 241 **Figure 2 – Ca<sup>2+</sup> dynamics in MFB terminals**

242 (a) Montage of multiple two-photon Z-stack maximal projections showing the axon anatomy of a  
243 typical granule cell filled with a morphological tracer AlexaFluor 594. The intact axon was  
244 followed to the CA3 region, where it formed giant MFB terminals (insets). (b,c) Representative  
245 measurements of Ca<sup>2+</sup> dynamics in two MFBs. Left, bouton morphology, dots indicate recording  
246 positions for random-access two-photon Ca<sup>2+</sup> imaging. Middle, corresponding whole bouton  
247 Ca<sup>2+</sup> Fluo-4FF fluorescence elevations in response to 20 Hz and 100 Hz AP stimulations (black  
248 traces, average of 140 and 133 sweeps, respectively). The red curves represent the non-stationary  
249 single compartment model fit corresponding to  $\Delta[\text{Ca}^{2+}]_{\text{total}} = 33.3 \mu\text{M}$ , model-predicted values of  
250  $k_{rem}$  are shown for each bouton. Right, corresponding AP-evoked whole-bouton [Ca<sup>2+</sup>]  
251 transients computed using the non-stationary model. (d) Normalized peak amplitude of AP-  
252 evoked Fluo-4FF fluorescence as a function of AP number (n = 7 MFBs for both 20 Hz and 100  
253 Hz stimulation).



254

255 **Figure 3 – Modelling of evoked presynaptic  $\text{Ca}^{2+}$  dynamics and vesicular release reveals a**  
256 **plausible mechanism for AP counting logic in MFB terminals.**

257 (a) Left, geometry of a parallelepiped-shaped modelling unit ( $0.5 \mu\text{m} \times 0.5 \mu\text{m} \times 0.79 \mu\text{m}$ ) used  
258 in VCell simulations representing part of a MFB containing a single active zone (AZ) with a 40  
259 nm x 80 nm VGCC cluster, overlaid with a representative electron microscopy image that  
260 depicts part of a MFB with a single AZ (see Online methods for details). Right, snapshots of  
261 VCell-computed spatial  $[\text{Ca}^{2+}]$  profiles in the central XZ modelling unit plane during 6X100 Hz  
262 AP stimulation in the limiting case of ‘Mobile CaM’ model. (b) Left, VCell-computed  $[\text{Ca}^{2+}]$   
263 transients at the release site located at  $d = 90 \text{ nm}$  away from the VGCC cluster during 6X100 Hz  
264 and 5X20 + 1X100 AP trains. Right, plot of corresponding residual ( $[\text{Ca}^{2+}]_{\text{residual}}$ ) and peak  
265 ( $[\text{Ca}^{2+}]_{\text{peak}}$ ) before and after each AP in the trains (c) Schematics of the modified allosteric model  
266 of  $\text{Ca}^{2+}$ -driven vesicle release and replenishment<sup>12</sup>. (d) Simulated EPSCs, average of  $M =$   
267 60,000 Monte Carlo runs for each paradigm scaled for RRP of size  $m = 125$ . (e) Summary graph  
268 showing simulated EPSC amplitude as a function of time for the two stimulation paradigms  
269 shown in (d). (f) Snapshots of spatial distribution of normalized total [CaM] (which accounts for  
270 all CaM molecules irrespective of their  $\text{Ca}^{2+}$  binding state) in the AZ plane, illustrating  
271 progressive dislocation of CaM from the membrane during AP stimulation predicted by ‘CaM  
272 dislocation model’<sup>14</sup> (see Online methods for details). (g) VCell-computed  $[\text{Ca}^{2+}]$  transients at  
273 the release site during 6X100 Hz and 5X20 Hz + 1X100 Hz AP trains and (h) corresponding  
274 simulated EPSCs for the case of ‘CaM dislocation’ model. (i) Summary graph showing that  
275 experimentally observed short-term facilitation levels are likely to be explained by joint  
276 contribution of the two limiting cases represented by ‘Mobile CaM’ (low facilitation) and by  
277 ‘CaM dislocation’ (high facilitation) models that both allow AP counting logic.

278

279

280

281

282

## 283 **Online Methods**

### 284 *Hippocampal slice preparation*

285 Experiments involving the use of animals were performed in accordance with guidelines  
286 provided by the Animal Protection Committee of Laval University. Acute hippocampal slices  
287 from P17 – P25 male rats were prepared according to accepted procedures<sup>7</sup>. First, the animals  
288 were anesthetized with isoflurane. The brain was extracted and immersed in an oxygenated  
289 cutting ACSF solution maintained at 4 °C. The cutting ACSF solution contained (in mM): NaCl  
290 87, NaHCO<sub>3</sub> 25, KCl 2.5, NaH<sub>2</sub>PO<sub>4</sub> 1.25, MgCl<sub>2</sub> 7, CaCl<sub>2</sub> 0.5, glucose 25 and sucrose 75 (pH =  
291 7.4, 330 mOsm). The brain was then dissected according to instructions for optimal preservation  
292 of the hippocampal mossy fibers<sup>19</sup>. The brain hemispheres were glued on the specimen disk of a  
293 Leica VT1000S vibratome and submerged in cutting ACSF solution. Slices (300 µm) were cut  
294 and transferred to an oxygenated and heated (32 °C) ACSF solution containing (in mM): NaCl  
295 124, NaHCO<sub>3</sub> 25, KCl 2.5, MgCl<sub>2</sub> 2.5, CaCl<sub>2</sub> 1.2 and glucose 10 (pH = 7.4, 300 mOsm). Slices  
296 were left to recover for 30 minutes at 32 °C. Slices were then left at room temperature.  
297 Experiments were started one hour after the slicing procedure.

298

### 299 *Whole-cell patch-clamp recording*

300 Hippocampal slices were maintained under a nylon mesh in a recording chamber under an  
301 upright microscope. The slice was perfused with oxygenated warmed recording ACSF solution,  
302 containing (in mM): NaCl 124, NaHCO<sub>3</sub> 25, KCl 2.5, MgCl<sub>2</sub> 2.5, CaCl<sub>2</sub> 1.2 and glucose 10. The  
303 solution was oxygenated by bubbling a gas mixture composed of 95% O<sub>2</sub> and 5% CO<sub>2</sub>.  
304 Temperature was maintained at 32 ± 1 °C throughout all experiments. The perfusion rate was  
305 adjusted to a constant 2 ml/min. Visually-guided whole-cell patch-clamp recordings were  
306 obtained from CA3 pyramidal cells with a solution containing: K-gluconate 120, KCl 20,  
307 HEPES 10, MgCl<sub>2</sub> 2, Mg<sub>2</sub>ATP 2, NaGTP 0.3, phosphocreatine 7, EGTA 0.6 (pH = 7.2, 295  
308 mOsm). Borosilicate glass electrodes had a resistance of 3 – 5 MΩ for CA3 pyramidal cell  
309 recordings. After obtaining a stable whole-cell configuration, CA3 pyramidal cells were held in  
310 voltage-clamp or in current-clamp. Voltage-clamp recordings were performed at -70 mV.  
311 Current-clamp recordings were performed at the resting membrane potential of the CA3  
312 pyramidal cells (-70 ± 5 mV). Minimal stimulation of mossy fibers was performed using an

313 electrode positioned in the stratum lucidum and connected to a constant current stimulus isolator  
314 (A360, WPI, Florida, USA). The pipette was gently moved in the stratum lucidum until large,  
315 fast and facilitating EPSCs could be recorded. The stimulation intensity was then decreased to  
316 achieve conditions in which both failures and successes could be observed. To confirm the  
317 mossy fiber identity of the recorded EPSCs or EPSPs, DCG-IV (1  $\mu$ M) was applied in the end of  
318 a subset of experiments. Recordings in which the postsynaptic response was decreased by at least  
319 80% were conserved for further analysis. Electrophysiological data was acquired with Molecular  
320 Devices equipment (Axopatch 200B amplifier and Digidata 1322A, or MultiClamp 700B  
321 amplifier with Digidata 1440A) and the Clampex suite. The electrophysiological data was low-  
322 pass filtered at 2 kHz, digitized at 10 kHz and recorded on a personal computer. For calcium  
323 imaging experiments, whole-cell patch-clamp recordings were obtained from granule cells with  
324 the solution described above, but lacking EGTA. This patch solution was supplemented with 40  
325  $\mu$ M of the morphological dye Alexa-594 and 375  $\mu$ M of the low-affinity calcium indicator Fluo-  
326 4FF. Granule cells were held in the current-clamp mode at their resting membrane potential.  
327 Action potentials were evoked by brief current injections (2 ms, 1 – 1.5 nA) in trains of 10 APs,  
328 at either 20 Hz or 100 Hz. Glass electrodes used for whole-cell recordings from granule cells had  
329 a resistance between 4 – 7 M $\Omega$ .

330

### 331 *Random-access two-photon calcium imaging*

332 Following diffusion for at least 1 hour of the fluorophores in the granule cell, the axon was  
333 tracked to the CA3 region<sup>7,9</sup>. Giant MF boutons were unequivocally identified in the CA3 region  
334 based on their morphology imaged with the AlexaFluor-594 fluorescence. 20 sites evenly  
335 dispersed on the whole bouton were recorded quasi-simultaneously, yielding an imaging speed  
336 of 950 Hz. This recording paradigm allowed a good compromise between signal to noise ratio of  
337 the signal and the temporal resolutions, and therefore enabled recording calcium elevations  
338 generated by high-frequency firing of APs. The very low-affinity Ca<sup>2+</sup> indicator Fluo-4FF  
339 proved critical to resolve high-frequency bursts of APs evoked at 100 Hz without indicator  
340 saturation. We used a custom built random-access two-photon microscope<sup>7,20</sup>. A two-photon  
341 titanium:sapphire laser (Chameleon Ultra II, Coherent) tuned at 800 nm provided the light source  
342 (80 MHz, 140 fs pulse width and with an average power >4 W). The laser beam was redirect by  
343 a pair of acousto-optic deflectors (AODs; A-A Opto Electronics) to enable random access over

344 the field of view. The laser beam was focused on the brain slice through a high NA water-  
345 immersion objective (25X objective, with a NA = 0.95). Transmitted photons passed through a  
346 high-numerical aperture oil condenser (NA = 1.4) and were low-pass filtered at 720 nm. Photons  
347 were separated by a dichroic mirror (580 nm) to independently collect red and green photons.  
348 Photons were then band-pass filtered at 500-560 nm for the green channel and 595-665 nm for  
349 the red channel. Both the red and the green photons were collected simultaneously. Collection of  
350 photons was performed using a pair of AsGaP photomultiplier tubes (H7422P-40, Hamamatsu)  
351 located close to the recording chamber. The laser and the acquisition system were controlled by a  
352 Labview custom-made software<sup>20</sup>.

353

### 354 *Analysis of electrophysiological and calcium imaging data*

355 Electrophysiological data was analyzed in Clampfit and in Igor Pro. AP probability was  
356 calculated from 20 sweeps. To avoid inducing long-term plasticity, sweeps were evoked every  
357 30 seconds. EPSC amplitude was measured from the average trace obtained from 20 sweeps.  
358 Calcium elevations recorded in giant MF terminals were exported to Excel database. The  $\Delta F/F$   
359 ratio was calculated for all trials and trials (50 – 140) were averaged together. The peak  $Ca^{2+}$   
360 amplitude for individual calcium transients was determined from baseline to peak. In all figures,  
361 symbols show the mean and the error bars indicate the SEM.

362

### 363 *Non-stationary single compartment model of presynaptic $Ca^{2+}$ dynamics*

364 Experimental  $Ca^{2+}$  fluorescence traces were analysed using a non-stationary single compartment  
365 model<sup>9,10</sup>, which assumes spatial homogeneity of  $[Ca^{2+}]$  in the nerve terminal. The model is  
366 described by the following system of differential equations:

$$\frac{d[Ca^{2+}]}{dt} = j_{Ca} + k_{off}^I [CaI] - k_{on}^I [Ca^{2+}][I] + \sum_i (k_{off}^{B_i} [CaB_i] - k_{on}^{B_i} [Ca^{2+}][B_i]) - P_{rem}$$

$$\frac{d[I]}{dt} = k_{off}^I [CaI] - k_{on}^I [Ca^{2+}][I]$$

$$\frac{d[B_i]}{dt} = k_{off}^{B_i} [CaB_i] - k_{on}^{B_i} [Ca^{2+}][B_i]$$

367

368 where the square brackets denote concentrations, and the superscript indices of the reaction rate  
369 constants denote endogenous  $Ca^{2+}$  buffers  $B_i$  or the Fluo-4FF indicator  $I$ . The action potential-

370 dependent  $\text{Ca}^{2+}$  influx time course  $j_{\text{Ca}}$  was approximated by the Gaussian function

371 
$$j_{\text{Ca}} = \frac{\Delta[\text{Ca}^{2+}]_{\text{total}}}{\sigma\sqrt{2\pi}} \sum_i \exp\left(-\frac{(t-t_i^{\text{AP}})^2}{2\sigma^2}\right)$$
 where  $t_i^{\text{AP}}$  denotes the times of peaks of  $\text{Ca}^{2+}$  currents

372 during each action potential. The use of the low affinity  $\text{Ca}^{2+}$  indicator Fluo-4FF ( $K_d = 9.7 \mu\text{M}$ )  
373 did not allow us to estimate resting  $[\text{Ca}^{2+}]_{\text{rest}}$  reliably, which in turn prevented the numerical  
374 estimation of the total volume averaged presynaptic  $\text{Ca}^{2+}$  entry  $\Delta[\text{Ca}^{2+}]_{\text{total}}$ . Therefore we used  
375 previous estimates for both  $[\text{Ca}^{2+}]_{\text{rest}} = 75 \text{ nM}$  and  $\Delta[\text{Ca}^{2+}]_{\text{total}} = 50 \mu\text{M}$  obtained with high  
376 affinity  $\text{Ca}^{2+}$  indicators<sup>9,21</sup>. Because in our experimental conditions  $[\text{Ca}^{2+}]_{\text{ext}} = 1.2 \text{ mM}$  (in  
377 comparison to  $[\text{Ca}^{2+}]_{\text{ext}} = 2 \text{ mM}$  in ref.<sup>9</sup>) we reduced  $\Delta[\text{Ca}^{2+}]_{\text{total}}$  determined in ref.<sup>9</sup> by a factor  
378 of 1.5 based on the dependency of VGCC conductance on  $[\text{Ca}^{2+}]_{\text{ext}}$ .  $\text{Ca}^{2+}$  removal was  
379 approximated by a first-order reaction  $P_{\text{rem}} = k_{\text{rem}}([\text{Ca}^{2+}] - [\text{Ca}^{2+}]_{\text{rest}})$ . We assumed that a MFB  
380 terminal contains three endogenous buffers ATP, CB and CaM. The complete set of model  
381 parameters and  $\text{Ca}^{2+}$  binding reactions is specified in **Supplementary Table 1**. The model was  
382 numerically solved using the adaptive step-size Runge-Kutta algorithm. The model operated with  
383 only two adjustable (free) parameters: the unknown ratio between resting Fluo-4FF fluorescence  
384 signal and the background fluorescence and  $\text{Ca}^{2+}$  removal rate  $k_{\text{rem}}$ . Both parameters were  
385 constrained by a straightforward fitting procedure that would match the calculated and  
386 experimental fluorescence profiles.

387

### 388 *Spatial VCell model of MFB $\text{Ca}^{2+}$ dynamics*

389 Three-dimensional modeling of AP-evoked presynaptic  $\text{Ca}^{2+}$  influx, buffering, and diffusion was  
390 performed in the Virtual Cell (VCell) simulation environment (<http://vcell.org>) using the fully  
391 implicit adaptive time step finite volume method on a 10 nm meshed geometry. A simulation  
392 unit, representing part of a MFB terminal with a single active zone (AZ), was modeled as a  
393 parallelepiped of size  $x = 0.5 \mu\text{m}$ ,  $y = 0.5 \mu\text{m}$  and  $z = 0.79 \mu\text{m}$ . The AZ was located in the  
394 XY base ( $z = 0.79 \mu\text{m}$ ) and contained a single rectangular VGCC cluster of dimensions  
395 40 nm x 80 nm placed in the center of the AZ. The size of XY base corresponded to the average  
396 distance among different AZs in MFB terminals ( $0.5 \mu\text{m}$ )<sup>22</sup>. The height of the simulation unit

397 was adjusted to  $\bar{z} = 0.79 \mu\text{m}$  in order to match the magnitude of local VGCC-mediated  $\text{Ca}^{2+}$   
398 influx at the AZ (see below) to the value of experimentally estimated  $\Delta[\text{Ca}^{2+}]_{\text{total}} = 33.3 \mu\text{M}$ . We  
399 assumed that 28 VGCCs were evenly distributed within the VGCC cluster<sup>11,13</sup>. The average AP-  
400 evoked  $\text{Ca}^{2+}$  current was simulated using the five-state VGCC gating kinetic model in MFB<sup>11</sup>  
401 using the NEURON simulation environment<sup>14,23</sup> and the experimentally determined MFB AP  
402 waveform<sup>11</sup>, which was considered to be constant during burst of APs.  $\text{Ca}^{2+}$  extrusion by the  
403 bouton surface pumps (excluding the AZ) was approximated by a first-order reaction:  
404  $j_{\text{extr}} = k_{\text{extr}}([\text{Ca}^{2+}] - [\text{Ca}^{2+}]_{\text{rest}})$ <sup>10,24</sup> located at the XY parallelepiped base opposite to the AZ;  
405  $k_{\text{extr}}$  was calculated using the experimentally constrained single-compartment model average  
406  $\text{Ca}^{2+}$  removal rate ( $k_{\text{rem}} = 400 \text{ s}^{-1}$ ) as  $k_{\text{extr}} = \frac{V}{S} k_{\text{rem}} = 320 \mu\text{m s}^{-1}$  (where  $V$  is the volume of the  
407 simulation unit and  $S$  is the area of the XY base). In the case of ‘Mobile CaM’ model we  
408 assumed  $[\text{CaM}]_{\text{total}} = 150 \mu\text{M}$  as was estimated in **Supplementary Fig. 8a**. In the case of ‘CaM  
409 dislocation’ model we assumed that all CaM molecules were located within a single 10 nm layer  
410 of VCell voxels adjacent to the AZ plasma membrane (i.e. at the  $0.5 \mu\text{m} \times 0.5 \mu\text{m}$  bottom base of  
411 the simulation unit). Concentration of CaM was 3 molecules /  $10 \text{ nm} \times 10 \text{ nm} \times 10 \text{ nm}$  voxel, as  
412 estimated in **Supplementary Fig. 8c**. The details of ‘CaM dislocation’ model are described in  
413 our previous publication (ref. 29). Briefly, we assumed that upon binding of two  $\text{Ca}^{2+}$  ions by the  
414 C-lobe a CaM molecule can irreversibly dissociate from the plasma membrane ( $k_{\text{off}}^{\text{CaM}} = 650 \text{ s}^{-1}$ ,  
415 ref. 29) and freely diffuse in the cytosol.

416

#### 417 *Modeling of $\text{Ca}^{2+}$ -triggered synaptic vesicle fusion*

418 We assumed that the vesicular  $\text{Ca}^{2+}$  release sensor was located at coupling distance  $d = 90 \text{ nm}$   
419 from the edge of VGCC cluster (**Fig. 3a**). To simulate glutamate release we used  $[\text{Ca}^{2+}](t)$   
420 profiles obtained in VCell at this location for each specific AP firing pattern in Monte Carlo  
421 simulations (implemented in MATLAB) based on the six-state allosteric  $\text{Ca}^{2+}$  sensor model<sup>12</sup>  
422 (**Fig. 3c**). The model also contained a stochastic re-priming step, which was preceded by a short  
423 refractory period (1 ms) immediately after vesicle fusion. The model parameters were:  $k_{\text{on}} = 100$   
424  $\mu\text{M}^{-1} \text{ s}^{-1}$ ,  $k_{\text{off}} = 4 \times 10^3 \text{ s}^{-1}$ ,  $b = 0.5$ ,  $f = 31.3$ ,  $I_{+} = 2 \times 10^{-4} \text{ s}^{-1}$ . The re-priming rate  $k_{\text{rep}} = 20 \text{ s}^{-1}$

425 was constrained using the experimental data for 50 stimuli applied at 100 Hz (**Supplementary**  
426 **Fig. 5**). For each stimulation paradigm, we performed 60,000 independent Monte Carlo runs  
427 with a time step  $dt = 10^{-6}$  s and thus determined distribution for the vesicle fusion time during  
428 AP burst. Simulated EPSC response was calculated as  $EPSC = m \sum_i qEPSC(t - t_i) / 60,000$ ,  
429 where  $m = 125$  is the average RRP size and  $qEPSC(t)$  is the average quantal EPSC which was  
430 determined using voltage-clamp recoding during the asynchronous phase of release (200 – 300  
431 ms after the last AP in the burst).

432

433

434

435

436

437

438

439

440

441

442

443

444

445

446

447

448

449

450

451

452

453

454

455

456

457

458 **Bibliography for Online Methods**

459 19 Bischofberger, J., Engel, D., Li, L., Geiger, J. R. & Jonas, P. Patch-clamp recording from  
460 mossy fiber terminals in hippocampal slices. *Nature protocols* **1**, 2075-2081,  
461 doi:10.1038/nprot.2006.312 (2006).

462 20 Otsu, Y. *et al.* Optical monitoring of neuronal activity at high frame rate with a digital  
463 random-access multiphoton (RAMP) microscope. *Journal of neuroscience methods* **173**,  
464 259-270, doi:10.1016/j.jneumeth.2008.06.015 (2008).

465 21 Jackson, M. B. & Redman, S. J. Calcium dynamics, buffering, and buffer saturation in  
466 the boutons of dentate granule-cell axons in the hilus. *The Journal of neuroscience : the*  
467 *official journal of the Society for Neuroscience* **23**, 1612-1621 (2003).

468 22 Rollenhagen, A. *et al.* Structural determinants of transmission at large hippocampal  
469 mossy fiber synapses. *The Journal of neuroscience : the official journal of the Society for*  
470 *Neuroscience* **27**, 10434-10444, doi:10.1523/JNEUROSCI.1946-07.2007 (2007).

471 23 Hines, M. L. & Carnevale, N. T. The NEURON simulation environment. *Neural*  
472 *computation* **9**, 1179-1209 (1997).

473 24 Matveev, V., Bertram, R. & Sherman, A. Residual bound Ca<sup>2+</sup> can account for the  
474 effects of Ca<sup>2+</sup> buffers on synaptic facilitation. *Journal of neurophysiology* **96**, 3389-  
475 3397, doi:10.1152/jn.00101.2006 (2006).

476

477

478

479

480

481



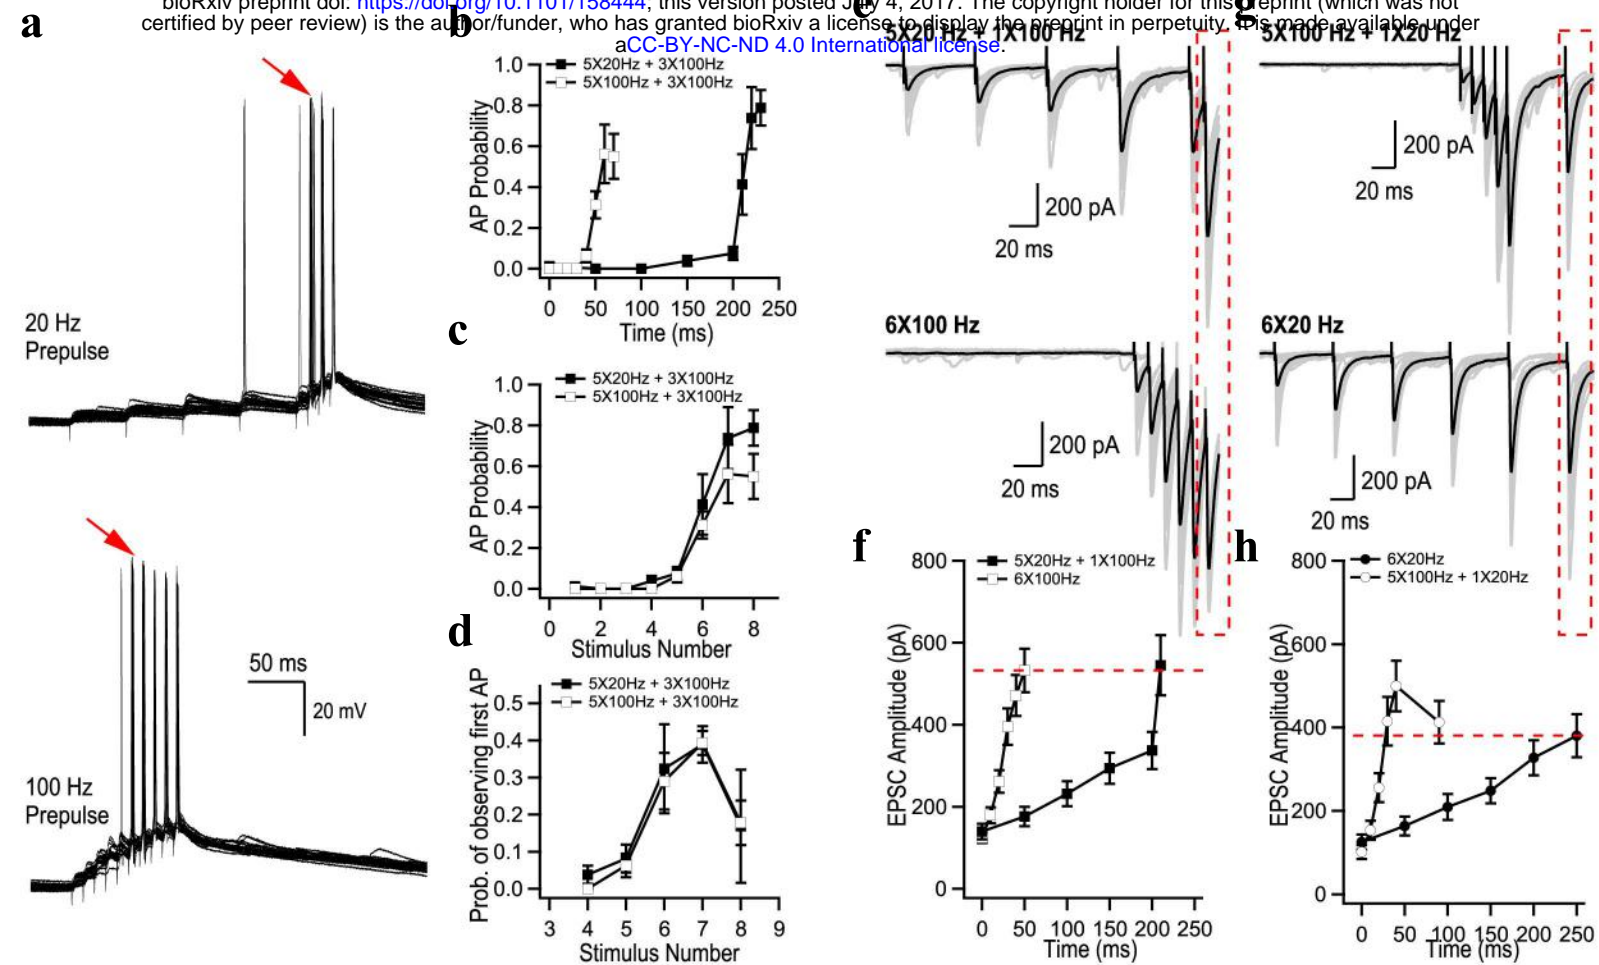

Figure 1

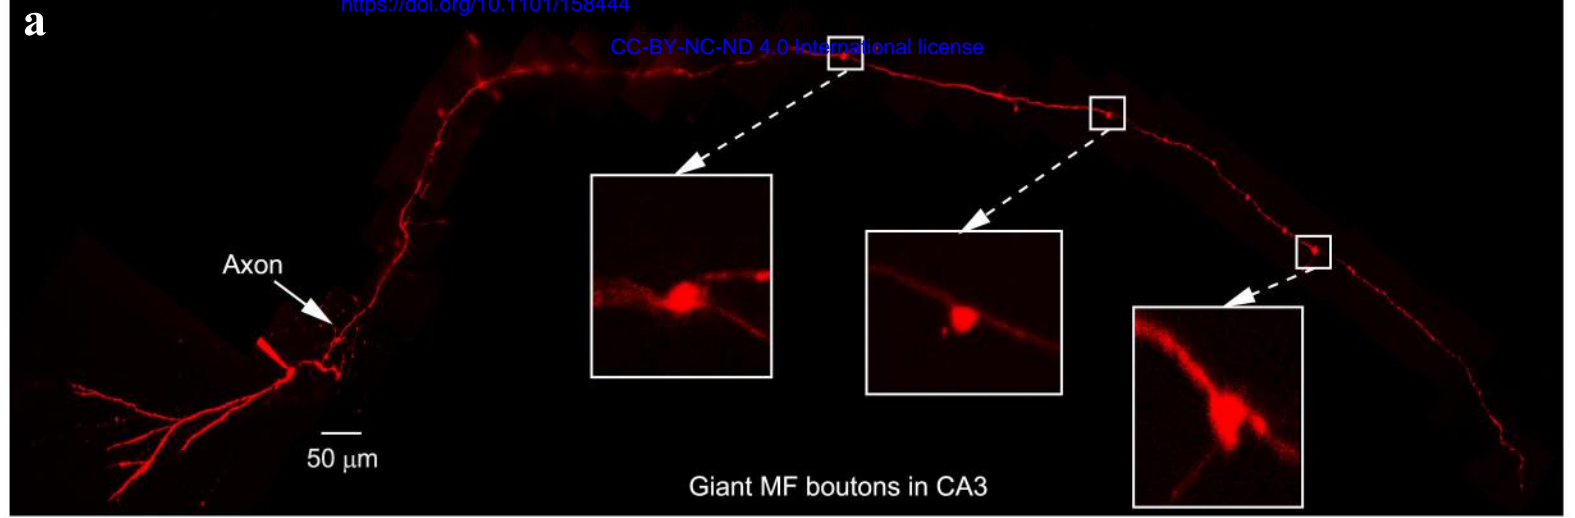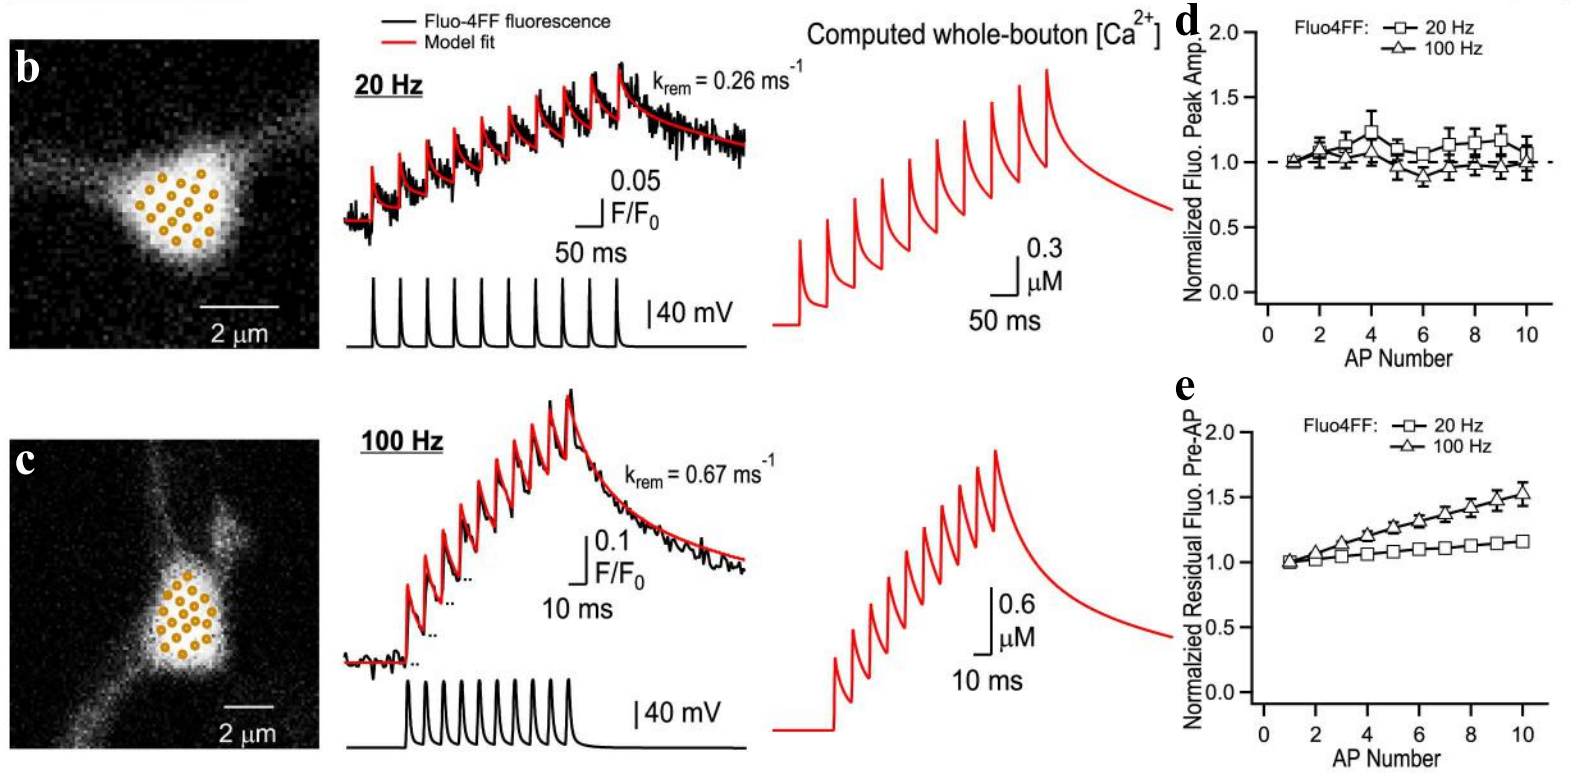

Figure 2

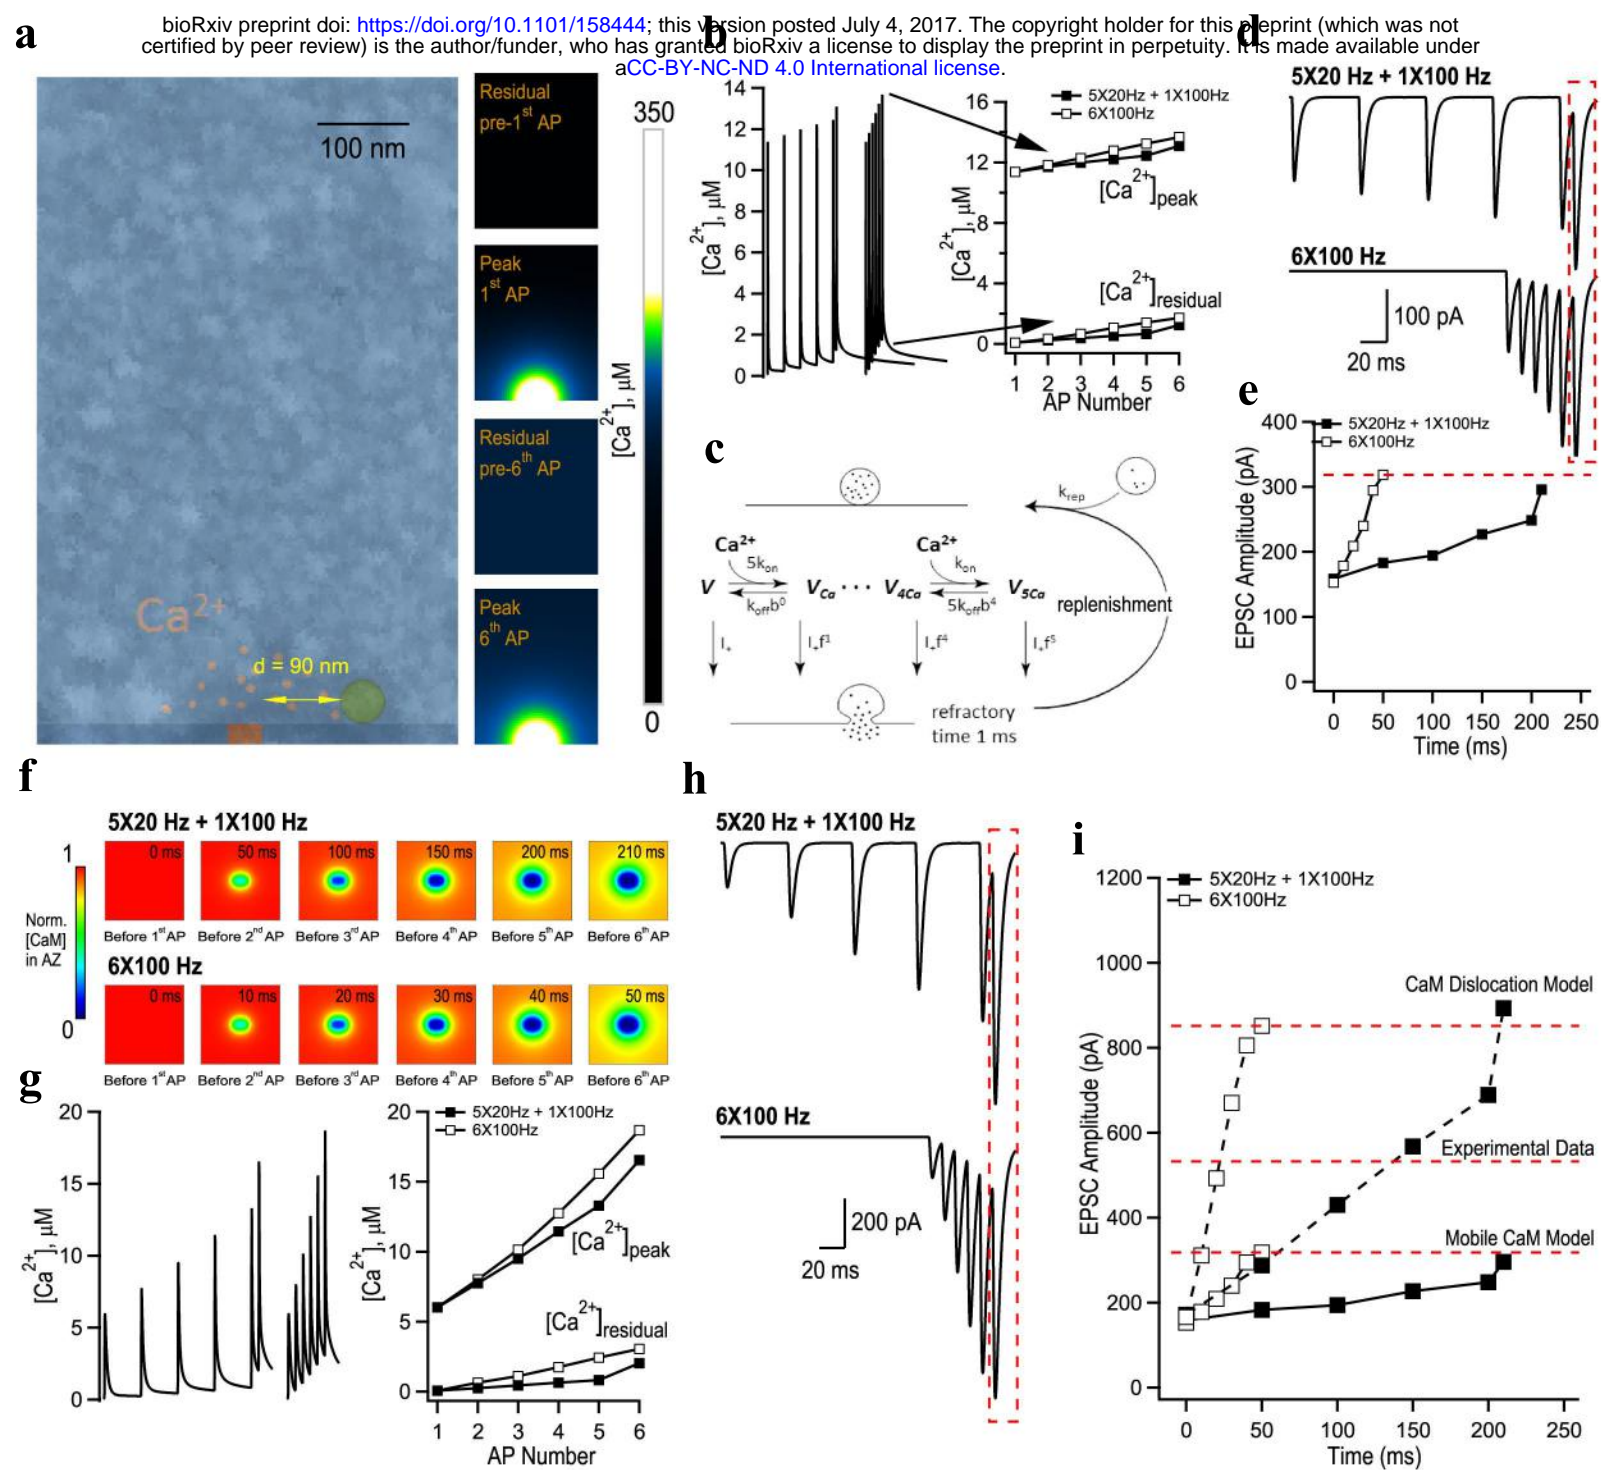

**Figure 3**
